# Supplementary material for: Carbon-phosphide monolayer with high carrier mobility and perceptibleI–Vresponse for superior gas sensing
Source: Royal Society of Chemistry journal article supplement (doi:10.1039/c9nj06447h), 2020-01-01
Supplement: c9nj06447h1.pdf [file c9nj06447h1.pdf]

# Supplementary Material

## Carbon-Phosphide Monolayer with High Carrier Mobility and Perceptible I-V Response for Superior Gas Sensing

Deobrat Singh,<sup>1,\*</sup> Vivekanand Shukla,<sup>2,†</sup> Pritam Kumar Panda,<sup>1</sup>  
Yogendra Kumar Mishra,<sup>3</sup> Horst-Günter Rubahn,<sup>3</sup> and Rajeev Ahuja<sup>1,4,‡</sup>

<sup>1</sup>*Condensed Matter Theory Group, Materials Theory Division,  
Department of Physics and Astronomy, Uppsala University, Box 516, 75120 Uppsala, Sweden*

<sup>2</sup>*Department of Microtechnology and Nanoscience (MC2),  
Chalmers University of Technology, SE-41296 Gothenburg, Sweden*

<sup>3</sup>*NanoSYD, Mads Clausen Institute, University of Southern Denmark, Alsion 2, 6400, Sønderborg, Denmark*

<sup>4</sup>*Applied Materials Physics, Department of Materials and Engineering,  
Royal Institute of Technology (KTH), S-10044 Stockholm, Sweden*

(Dated: January 31, 2020)

### 1. VIBRATIONAL PROPERTIES

Table 1, shows the values of vibrational frequencies of isolated and absorbed gas molecules on the CP monolayer. The vibrational frequencies of gas molecules can thus be referred to judge the strength of the interactions. In case of CO with CP system, the stretching vibrational frequencies between C-O is found to be  $2108.05 \text{ cm}^{-1}$  which is red-shifted from its isolated counterpart ( $2115.97 \text{ cm}^{-1}$ ), while in case of  $\text{CO}_2$  molecule, there are two types of stretching occurs i.e., symmetric stretching and asymmetric stretching. The symmetric stretching of gas+CP system (isolated gas molecules) have lower vibrational frequencies  $1313.00 \text{ cm}^{-1}$  ( $1314.47 \text{ cm}^{-1}$ ) as compared to the asymmetric stretching with  $2345.81 \text{ cm}^{-1}$  ( $2353.09 \text{ cm}^{-1}$ ). Apart from this, it shows deformation vibrational frequencies in gas molecules absorbed on CP system which has  $\approx 10 \text{ cm}^{-1}$  lower than the isolated system.

For  $\text{NH}_3$  molecule, the symmetric and asymmetric stretching of the gas-CP system (isolated gas) are  $3365.15 \text{ cm}^{-1}$  ( $3381.54 \text{ cm}^{-1}$ ) and  $3512.88 \text{ cm}^{-1}$  ( $3515.70 \text{ cm}^{-1}$ ), respectively. The above results clearly shows the weak interacting behaviour of three gases (CO,  $\text{CO}_2$  and  $\text{NH}_3$ ) that, we have already inferred from the binding energy and charge transfer calculations (refer main text).

Moreover, NO and  $\text{NO}_2$  gas molecules interact strongly with CP system as both gases have higher binding energy and charge transfer. Also, from the vibration frequencies, we found significant changes for both the gases. The red-shift occurs when N-O bond stretch which changes from  $1687.10 \text{ cm}^{-1}$  for isolated to  $1553.27 \text{ cm}^{-1}$  in the absorbed case. In addition to that, we found asymmetric stretching in  $\text{NO}_2$  i.e.,  $1479.32 \text{ cm}^{-1}$  for isolated and  $1495.33 \text{ cm}^{-1}$  for absorbed case while symmetric stretching for isolated case was  $1266.29 \text{ cm}^{-1}$  and  $1214.93 \text{ cm}^{-1}$  for absorbed case.

The significant changes in deformation frequencies are depicted in Table 1.

Therefore, from the aforementioned analysis, the favorable chemical bonding interactions of gas molecules on CP monolayer which induces significant changes in their vibration properties can be inferred and the changes in vibrational properties can also be a criterion for gas molecules detection.

TABLE I. The calculated vibrational frequencies ( $\text{cm}^{-1}$ ) for isolated CO, CO<sub>2</sub>, NH<sub>3</sub>, NO, and NO<sub>2</sub> molecules and these gas molecules absorbed on the surface of CP monolayer (gas+CP monolayer). The diatomic molecules has single frequency and tri-atomic gas molecules has three highest vibrational frequencies presented in this table.

| Types                         | Vibrational frequencies ( $\text{cm}^{-1}$ ) |                     |                       |
|-------------------------------|----------------------------------------------|---------------------|-----------------------|
|                               | asymmetric vibration                         | symmetric vibration | deformation vibration |
| Isolated CO                   | 2115.97                                      | —                   | —                     |
| CO+CP monolayer               | 2108.05                                      | —                   | —                     |
| Isolated CO <sub>2</sub>      | 2353.09                                      | 1314.47             | 637.50                |
| CO <sub>2</sub> +CP monolayer | 2345.81                                      | 1313.00             | 627.03                |
| Isolated NH <sub>3</sub>      | 3515.70                                      | 3381.54             | 1619.64               |
| NH <sub>3</sub> +CP monolayer | 3512.88                                      | 3365.15             | 1611.47               |
| Isolated NO                   | 1687.10                                      | —                   | —                     |
| NO+CP monolayer               | 1553.27                                      | —                   | —                     |
| Isolated NO <sub>2</sub>      | 1479.32                                      | 1266.29             | 773.07                |
| NO <sub>2</sub> +CP monolayer | 1495.33                                      | 1214.93             | 684.80                |

Here, we have computed the I-V response in x- (armchair direction) and y-direction (zigzag direction) due to their anisotropic nature of electronic properties. The variation of current with applied voltage follows Ohmic law in x-direction while y-direction not follows the Ohmic law. According to linear increment of the current I with voltage in x-direction, we have taken x-direction (zigzag direction) for transport calculations of gas absorption on CP monolayer.

\* [deobrat.singh@physics.uu.se](mailto:deobrat.singh@physics.uu.se)

† [vns391@gmail.com](mailto:vns391@gmail.com)

‡ [rajeev.ahuja@physics.uu.se](mailto:rajeev.ahuja@physics.uu.se)

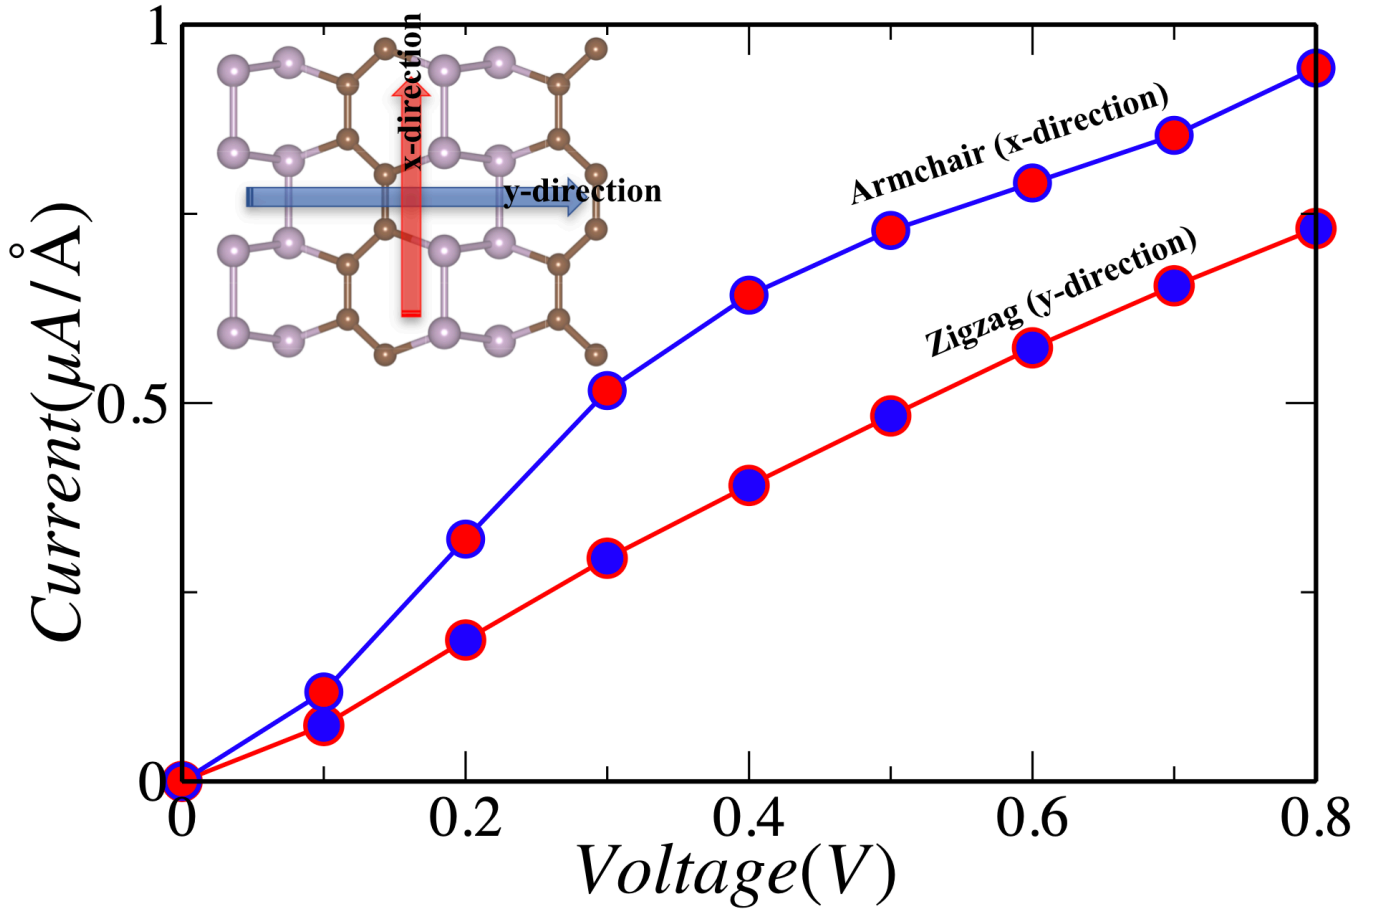

FIG. S1. Anisotropic behaviour of current corresponding applied voltage along the armchair (x-direction) and zigzag (y-direction) directions. Inside the structure shows the armchair and zigzag direction of atomic arrangement. The brown and gray color represents the carbon and phosphorus atoms.
